# Supplementary material for: The Tumor Microenvironment of Clear-Cell Ovarian Cancer
Source: PubMed Central journal article supplement — Cancer Immunol Res. 2022 Sep 12;10(11):1326–39. doi: 10.1158/2326-6066.CIR-22-0407 (PMC9627265; doi:10.1158/2326-6066.cir-22-0407), 2022-09-12
Supplement: cir-22-0407_supplementary_data_suppsf1_st1-st5.pdf [file cir-22-0407_supplementary_data_suppsf1_st1-st5.pdf]

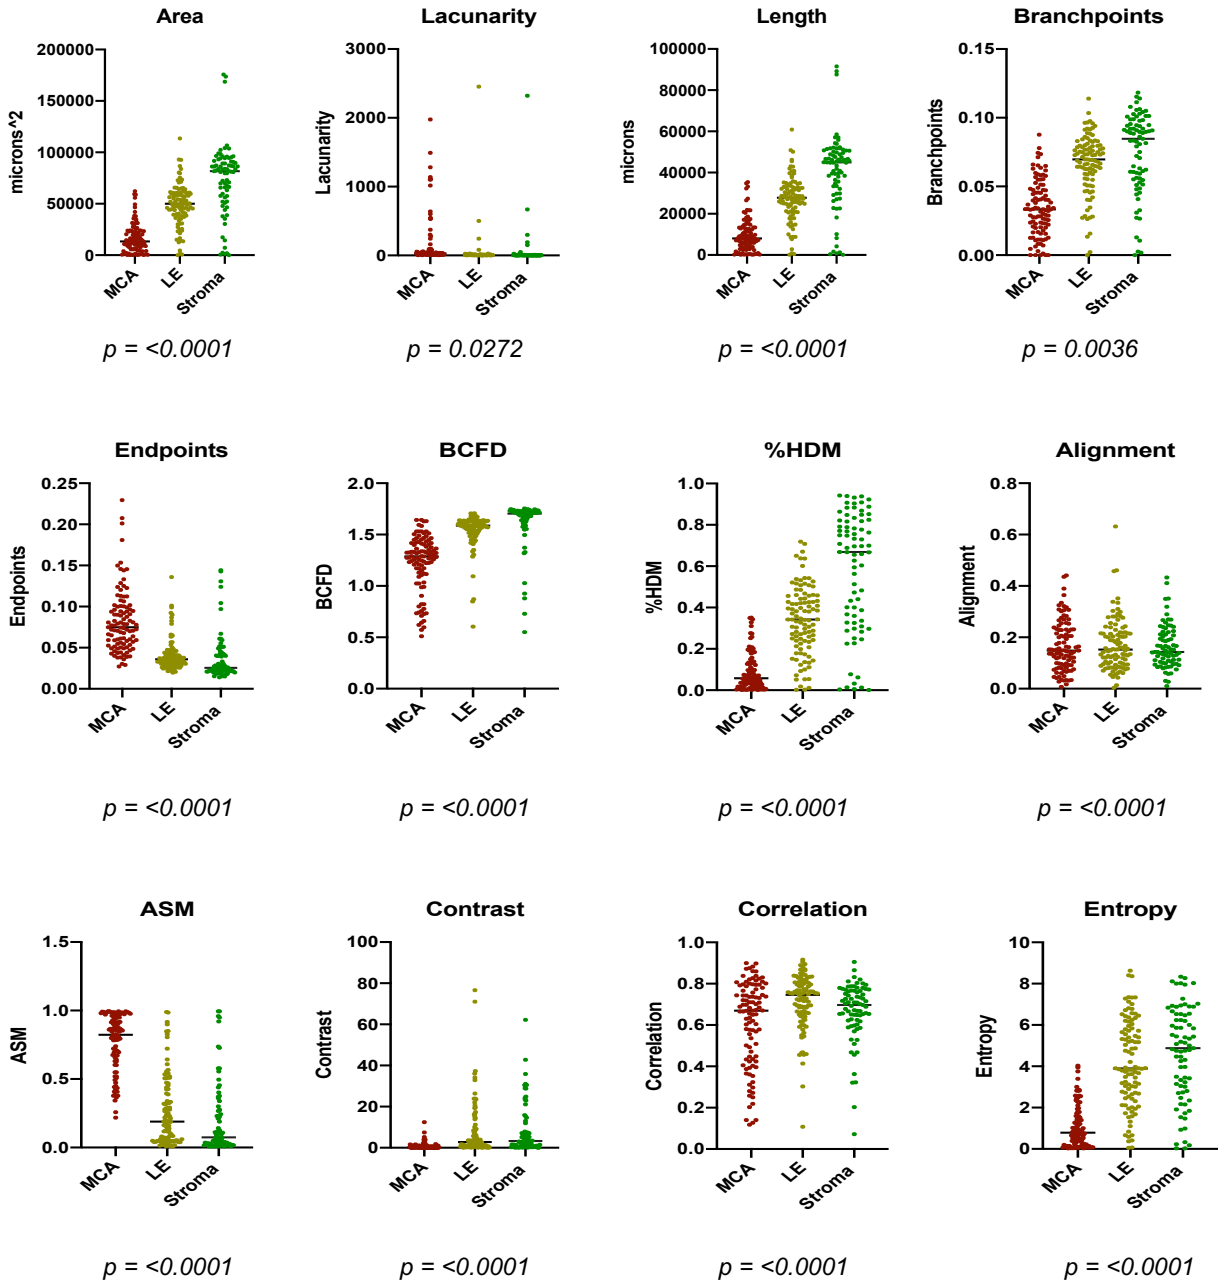

**Supplementary Figure 1: Analysis of how the structure and texture of collagen, identified by Masson's Trichrome, varies across the malignant cell area, leading edge and stroma of advanced clear cell ovarian cancer**

In 36 samples of advanced clear cell ovarian cancer, collagen was identified using Masson's Trichrome and subsequently underwent structural (TWOMBLI) and textural (Haralick Features; QuPath) analysis. The metrics were then compared across the malignant cell area (MCA), leading edge (LE) and stroma of samples to identify changes in the collagen extracellular matrix across the tumour microenvironment. BCFD; box counting fractal dimension, %HDM; percentage high density matrix, ASM; angular second moment.

| Marker            | FIGO III/IV (n) | ARID1A Wildtype (n) | ARID1A mutant (n) |
|-------------------|-----------------|---------------------|-------------------|
| CD3               | 28              | 15                  | 12                |
| CD8               | 28              | 15                  | 12                |
| CD4               | 20              | 11                  | 9                 |
| FOXP3             | 20              | 11                  | 9                 |
| CD45RO            | 20              | 12                  | 8                 |
| CD68              | 36              | 21                  | 14                |
| CD163             | 19              | 11                  | 8                 |
| CD20              | 20              | 12                  | 8                 |
| CD138             | 20              | 12                  | 8                 |
| MCT               | 20              | 10                  | 9                 |
| CD1a              | 12              | 6                   | 5                 |
| LAMP3             | 12              | 6                   | 6                 |
| CD66b             | 12              | 5                   | 6                 |
| aSMA              | 34              | 19                  | 14                |
| PD1               | 12              | 5                   | 6                 |
| PDL1              | 12              | 6                   | 6                 |
| PDL2              | 12              | 6                   | 6                 |
| VCAN              | 12              | 6                   | 6                 |
| Massons Trichrome | 36              | 21                  | 14                |
| ARID1A            | 36              | 21                  | 14                |

**Supplementary Table 1: Sample size for immunohistological profiling of advanced clear cell ovarian cancer**

Due to a limited number of FFPE slides available per patient, we allocated samples into cohorts to allow immunohistological profiling of each immune marker. This table shows the total sample number of FIGO stage III/IV clear cell ovarian cancer and subsequently how many of these were ARID1A wildtype or mutant; one sample had mixed ARID1A expression and was excluded from wildtype versus mutant analysis.

| Target             | Company       | Catalog Number | Concentration | Species | Primary Incubation | Antigen Retrieval |                      |          | Peroxidase Blocking |          |          | DAB Time (minutes) | Control  |
|--------------------|---------------|----------------|---------------|---------|--------------------|-------------------|----------------------|----------|---------------------|----------|----------|--------------------|----------|
|                    |               |                |               |         |                    | pH                | Temperature          | Duration | H202                | Dilutant | Duration |                    |          |
| Mast Cell Tryptase | Abcam         | ab134932       | 1:5000        | Rabbit  | Overnight          | 6                 | 95                   | 20       | 0.3%                | PBS      | 15       | 2.5                | Tonsil   |
| CD1a               | Abcam         | ab108309       | 1:250         | Rabbit  | Overnight          | 6                 | 95                   | 20       | 0.3%                | PBS      | 15       | 2.5                | Skin     |
| CD66b              | Abcam         | ab197678       | 1:200         | Rabbit  | Overnight          | 6                 | 95                   | 20       | 0.3%                | PBS      | 15       | 2.5                | Spleen   |
| FOXP3              | ThermoFisher  | eBIO7979       | 1:500         | Mouse   | Overnight          | 9                 | 95                   | 25       | 0.3%                | PBS      | 15       | 1                  | Tonsil   |
| CD163              | ThermoFisher  | MA5-11458      | 1:1000        | Mouse   | 1 hour RT          | 9                 | 95                   | 30       | 2%                  | Methanol | 30       | 1                  | Tonsil   |
| CD68               | ThermoFisher  | 14-0688-82     | 1:12,000      | Mouse   | 1 hour RT          | 9                 | 95                   | 30       | 2%                  | Methanol | 30       | 3                  | Tonsil   |
| CD45RO             | ThermoFisher  | MA1-19452      | 1:8000        | Mouse   | 1 hour RT          | 9                 | 95                   | 30       | 2%                  | Methanol | 30       | 3                  | Tonsil   |
| CD20               | ThermoFisher  | 14-0202-82     | 1:800         | Mouse   | 1 hour RT          | 9                 | 95                   | 30       | 2%                  | Methanol | 30       | 3                  | Tonsil   |
| CD8                | Agilent       | GA62361-2      | 1:1500        | Mouse   | 1 hour RT          | 9                 | 95                   | 30       | 2%                  | Methanol | 30       | 3                  | Tonsil   |
| CD3                | Agilent       | MA725429-2     | 1:800         | Rabbit  | 1 hour RT          | 9                 | 95                   | 30       | 2%                  | Methanol | 30       | 2                  | Tonsil   |
| CD4                | Agilent       | IS64930-2      | 1:400         | Mouse   | Overnight          | 9                 | 95                   | 20       | 2%                  | Methanol | 15       | 6                  | Tonsil   |
| LAMP3              | Abcam         | ab111090       | 1:1000        | Rabbit  | Overnight          | 6                 | 95                   | 20       | 0.3%                | PBS      | 15       | 4                  | Lung     |
| CD16               | Abcam         | ab203883       | 1:200         | Rabbit  | Overnight          | 6                 | 95                   | 20       | 2%                  | Methanol | 15       | 4                  | Spleen   |
| CD138              | Abcam         | ab128936       | 1:200         | Rabbit  | Overnight          | 9                 | 95                   | 20       | 2%                  | Methanol | 15       | 1                  | Tonsil   |
| PD-1               | BioLegend     | 367402         | 1:200         | Mouse   | 1 hour RT          | 9                 | 95                   | 30       | 2%                  | Methanol | 30       | 3                  | Tonsil   |
| PD-L1              | Cell Signal   | 13684T         | 1:400         | Rabbit  | 1 hour RT          | 9                 | 95                   | 30       | 2%                  | Methanol | 30       | 3                  | Placenta |
| PD-L2              | ThermoFisher  | PA5-20344      | 2.5:1000      | Rabbit  | 1 hour RT          | 9                 | 95                   | 30       | 2%                  | Methanol | 30       | 3                  | Placenta |
| PD-L2              | Sigma Aldrich | HPA0713411     | 1:500         | Rabbit  | 1 hour RT          | 9                 | 95                   | 30       | 2%                  | Methanol | 30       | 3                  | Placenta |
| Versican           | Sigma Aldrich | HPA004726      | 1:500         | Rabbit  | Overnight          | 6                 | 60                   | 60       | 2%                  | Methanol | 15       | 20                 | Placenta |
| αSMA               | Abcam         | ab5694         | 1:200         | Rabbit  | 1 hour RT          | 9                 | no antigen retrieval |          | 2%                  | Methanol | 30       | 5                  | Kidney   |
| ARID1A             | Abcam         | ab182561       | 1:1000        | Rabbit  | 1 hour RT          | 9                 | 95                   | 25       | 0.3%                | PBS      | 15       | 1                  | Tonsil   |

**Supplementary Table 2 Variable conditions for each immunohistochemistry markers**

This table lists the immunohistochemical target, the antibody and concentration used as well as the host species it is derived from which guides in secondary antibody selection. The primary incubation times vary between one hour at room temperature or overnight at 4°C. Antigen retrieval varies in terms of pH, temperature and duration. The peroxidase block also varies in the concentration of hydrogen peroxide and the dilutant used. The final column on the right lists the control tissues used.

| Immune Marker      | Advanced CCOC (n) | Early CCOC (n) | MCA (p) | LE (p) | Stroma (p)   |
|--------------------|-------------------|----------------|---------|--------|--------------|
| CD3                | 28                | 9              | 0.6862  | 0.6429 | 0.8438       |
| Mast Cell Tryptase | 20                | 9              | 0.8983  | 0.6373 | 0.2503       |
| CD20               | 20                | 9              | 0.1295  | 0.0783 | 0.23         |
| CD68               | 36                | 9              | 0.6471  | 0.243  | 0.1654       |
| $\alpha$ SMA       | 34                | 9              | 0.647   | 0.081  | <b>0.024</b> |

**Supplementary Table 3: Significance values for the comparison of immune cell markers between early (FIGO stage I and II) and advanced stage (FIGO III and IV) clear cell ovarian cancer (CCOC)**

Immune markers were identified using immunohistochemistry and quantified by either positive cells per high powered field (CD3, CD20, Mast Cell Tryptase) or percentage positive area (CD68 and  $\alpha$ SMA). The distribution of the markers across the malignant cell area (MCA), leading edge (LE) and stroma were subsequently compared between a cohort of early and advanced stage CCOC. The only significant result, shown here in red, was that of stromal  $\alpha$ SMA, which was significantly higher in the stroma of advanced stage disease.

| Pathway                                                               | NES        | FDR q-val  |
|-----------------------------------------------------------------------|------------|------------|
| GOBP_COLLAGEN_METABOLIC_PROCESS                                       | -2.2148983 | 0.00303189 |
| GOBP_COLLAGEN_BIOSYNTHETIC_PROCESS                                    | -2.1887088 | 0.00438903 |
| GOBP_POSITIVE_REGULATION_OF_COLLAGEN_METABOLIC_PROCESS                | -2.03516   | 0.01093186 |
| GOCC_COLLAGEN_CONTAINING_EXTRACELLULAR_MATRIX                         | -2.0267718 | 0.00814786 |
| GOBP_REGULATION_OF_COLLAGEN_METABOLIC_PROCESS                         | -1.928109  | 0.01429047 |
| GOBP_COLLAGEN_FIBRIL_ORGANIZATION                                     | -1.865479  | 0.0196563  |
| REACTOME_ASSEMBLY_OF_COLLAGEN_FIBRILS_AND_OTHER_MULTIMERIC_STRUCTURES | -1.8605988 | 0.04044084 |
| GOCC_COLLAGEN_TRIMER                                                  | -1.8583226 | 0.0329106  |
| REACTOME_COLLAGEN_FORMATION                                           | -1.8391806 | 0.04604144 |
| GOBP_COLLAGEN_CATABOLIC_PROCESS                                       | -1.8389298 | 0.02112176 |
| REACTOME_COLLAGEN_DEGRADATION                                         | -1.8341143 | 0.04659602 |

**Supplementary Table 4: Pathway enrichment for collagen pathways between ARID1A wildtype and mutant clear cell ovarian cancer**

When the differentially expressed genes were ranked by T statistic, pathway enrichment using the Broad Institute Gene Set Enrichment Analysis (GSEA) platform, demonstrated 11 pathways involved in collagen biology that were significantly different at an FDR q value of 0.05

| Metric - Region              | Univariate analysis |                    | Multivariate analysis |                          |
|------------------------------|---------------------|--------------------|-----------------------|--------------------------|
|                              | P-Value             | HR (95% CI for HR) | P-Value               | HR (95% CI for HR)       |
| CD8 - Malignant Cell Area    | 0.022               | 3.5 (1.2-10)       | 0.0162                | 4.53 (1.32283-15.513)    |
| CD45RO - Malignant Cell Area | 0.055               | 3.3 (0.97-11)      | 0.0718                | 3.25856 (0.90062-11.790) |
| CD4 - Leading Edge           | 0.0066              | 5.4 (1.6-18)       | 0.00874               | 9.0332 (1.74325-46.808)  |
| aSMA - Leading Edge          | 0.038               | 2.5 (1.1-6.2)      | 0.0546                | 2.4953 (0.9823-6.339)    |
| Correlation - Leading Edge   | 0.024               | 0.41 (0.19-0.89)   | 0.00108               | 0.2016 (0.07713-0.5268)  |
| CD4 - Stroma                 | 0.014               | 7.4 (1.5-36)       | 0.0052                | 13.2447 (2.16308-81.098) |
| Alignment - Stroma           | 0.01                | 0.28 (0.11-0.74)   | 0.0177                | 0.2425 (0.07517-0.782)   |
| ASM - Stroma                 | 0.012               | 3.4 (1.3-8.7)      | 0.0426                | 3.2994 (1.04057-10.462)  |

**Supplementary Table 5: The tumour microenvironment metrics which were significantly associated with overall survival following univariate and multivariate analysis**

Cox proportional hazards analysis and Kaplan-Meier analysis were performed, taking into account FIGO stage, ARID1A status, Aletti score and whether adjuvant chemotherapy was received or not. Five metrics remained significant following multivariate analysis; CD8 cells within the malignant cell area, CD4 cells at the leading edge (LE) and stroma, collagen correlation at the LE, collagen alignment and angular second moment in the stroma.
